# Supplementary material
Source: PubMed Central journal article supplement (PMC1895188)
Supplement: blood_2004-09-3687_1.pdf [file blood_2004-09-3687_1.pdf]

## Supplemental Material and Methods

### Thoracic duct cannulation

Differentially labeled lymphocytes were injected at -18h and -2.5h. At -1h C57BL/6 mice were fed with 700  $\mu$ l of olive oil by gavage. Mice were subsequently anaesthetized by i.p. injection of ketamine (50 mg/kg) and xylazine (10 mg/kg), the peritoneal cavity was opened by an infradiaphragmatic incision and the abdominal contents were retracted into the right side of the peritoneal cavity. Using a stereomicroscope, the cisterna chyli, located dorsal to the left renal lymph node, was identified and further exposed by dissection. A PE-10 polyethylene catheter connected to a 1ml syringe (both heparinized) was inserted into the cisterna chyli and lymph was slowly aspirated over 10-20 min. Lymph cells were washed once with PBS, stained with TCR $\beta$ -APC and B220-PerCP and analyzed by flow cytometry.

### Assessment of homed lymphocyte dwell time in LNs

To analyze the effect of S1PR agonists on T cell emigration from SLO, GFP<sup>+</sup> T cells were adoptively transferred into BALB/c mice at time = 0h. 4h later, mice were injected i.v. with mAb Mel-14 (150  $\mu$ g) to neutralize L-selectin, an essential receptor for lymphocyte homing to all SLO other than the spleen. The effect of Mel-14 was assessed by injecting a second, TRITC-labeled population 30 min after Mel-14 administration. mAb-induced blockade of homing was virtually complete in PLN and pronounced, but not complete in MLN and PP (where  $\alpha$ 4 $\beta$ 7 integrins partially substitute for L-selectin). Thus, GFP<sup>+</sup> T cells could only home to PLN during the initial 4h window before Mel-14 treatment, and any subsequent decrease in intranodal numbers should be a consequence of T cell exit. To assess the effect of FTY-P on the retention of GFP<sup>+</sup> T cells, mice were treated with FTY-P (1 mg/kg i.p.) or saline 5h and 20h after injection and sacrificed after 24h. PBL and SLO were subsequently analyzed by FACS. To study dwell times of S1P<sub>1</sub><sup>-/-</sup> or S1P<sub>1</sub><sup>+/-</sup> thymocytes, differentially labeled cells were adoptively transferred and recipients were treated with Mel-14, followed by tissue harvest as described above. Single-cell suspensions were stained with anti-CD4-PerCP and anti-CD8 $\alpha$ -APC and analyzed by FACS.
