# Supplementary material
Source: PubMed Central journal article supplement (PMC1895188)
Supplement: blood_2004-09-3687_2.pdf [file blood_2004-09-3687_2.pdf]

## Effect of FTY-P or FTY720 treatment on cell counts in PBL and SLO.

| cell number<br>( $10^6 \pm \text{SEM}$ ) | 2.5 h          |                     |                    | 16 h           |                    |                     |
|------------------------------------------|----------------|---------------------|--------------------|----------------|--------------------|---------------------|
|                                          | control        | FTY-P               | FTY720             | control        | FTY-P              | FTY720              |
| PBL                                      | $2.5 \pm 0.3$  | $1.0 \pm 0.3^{***}$ | $0.9 \pm 0.1^{**}$ | $2.2 \pm 0.2$  | $0.8 \pm 0.2^{**}$ | $0.4 \pm 0.1^{***}$ |
| spleen                                   | $62.0 \pm 2.6$ | $59.2 \pm 4.6$      | $59.1 \pm 5.3$     | $75.4 \pm 6.4$ | $73.6 \pm 6.6$     | $84.9 \pm 9.1$      |
| PLN                                      | $9.0 \pm 1.1$  | $8.4 \pm 1.4$       | $10.8 \pm 0.8$     | $10.1 \pm 1.0$ | $10.9 \pm 1.0$     | $9.9 \pm 0.6$       |
| MLN                                      | $15.1 \pm 1.8$ | $13.3 \pm 0.8$      | $16.3 \pm 1.3$     | $16.3 \pm 2.5$ | $19.4 \pm 3.4$     | $16.1 \pm 1.4$      |
| PP                                       | $5.0 \pm 0.6$  | $5.7 \pm 0.4$       | $6.3 \pm 0.4$      | $4.2 \pm 0.5$  | $7.5 \pm 0.9^{**}$ | $7.0 \pm 0.8^*$     |
