# Supplementary material
Source: PubMed Central journal article supplement (PMC1895188)

A

## B cells

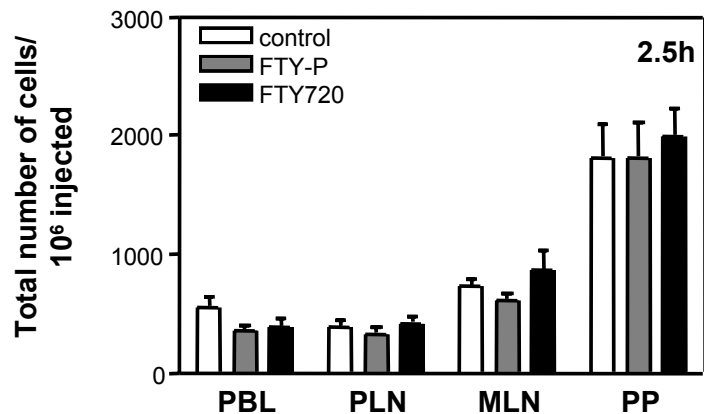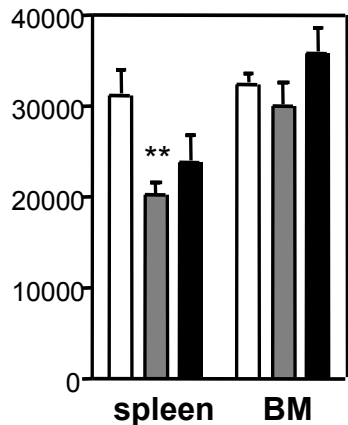

B

## B cells

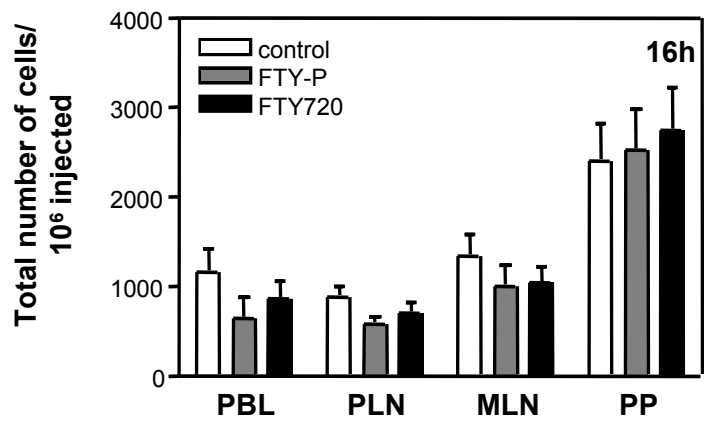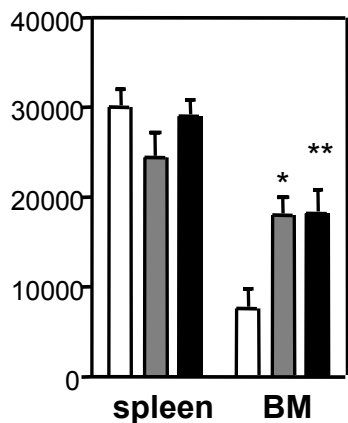

Supplement: blood_2004-09-3687_4.pdf [file blood_2004-09-3687_4.pdf]

# A Input

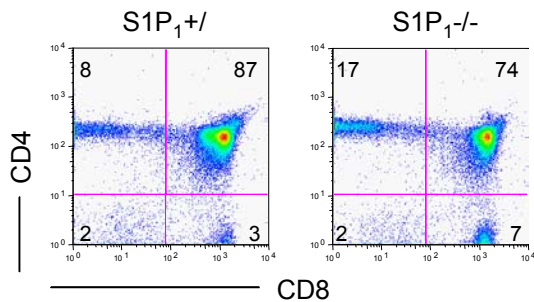

# B

## PBL

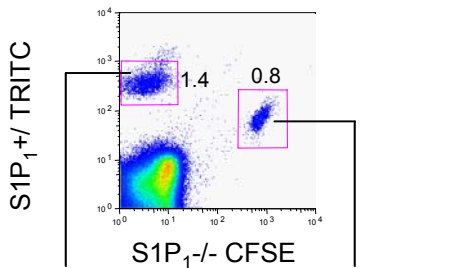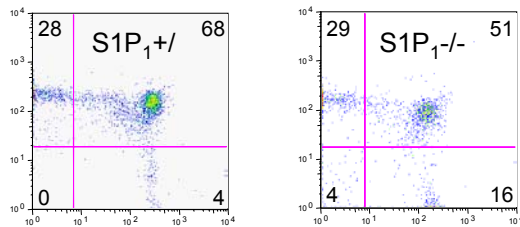

# C

## PLN

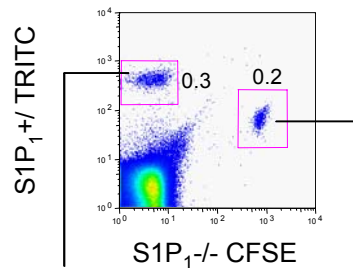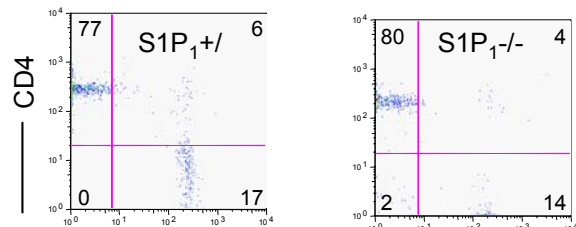

Supplement: blood_2004-09-3687_5.pdf [file blood_2004-09-3687_5.pdf]

**CD4+**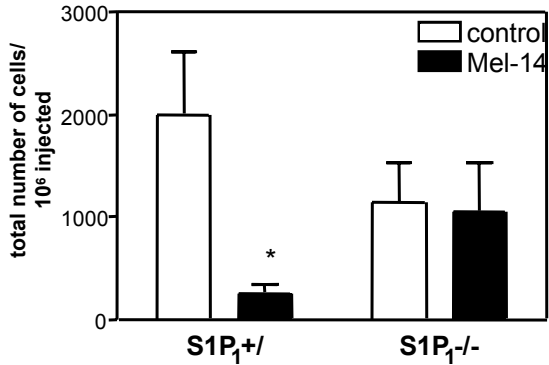**CD8+**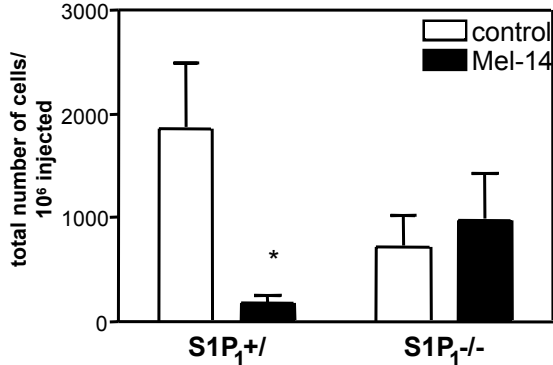

Supplement: blood_2004-09-3687_6.pdf [file blood_2004-09-3687_6.pdf]

A

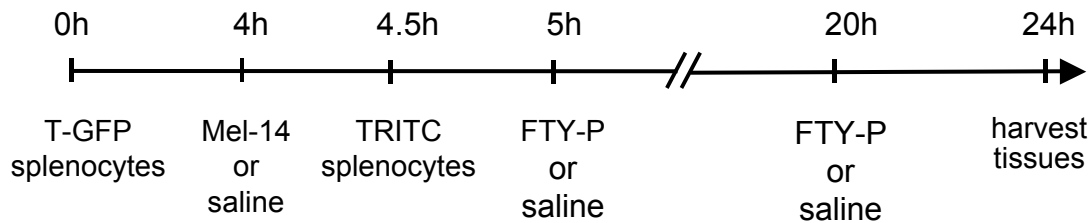

B

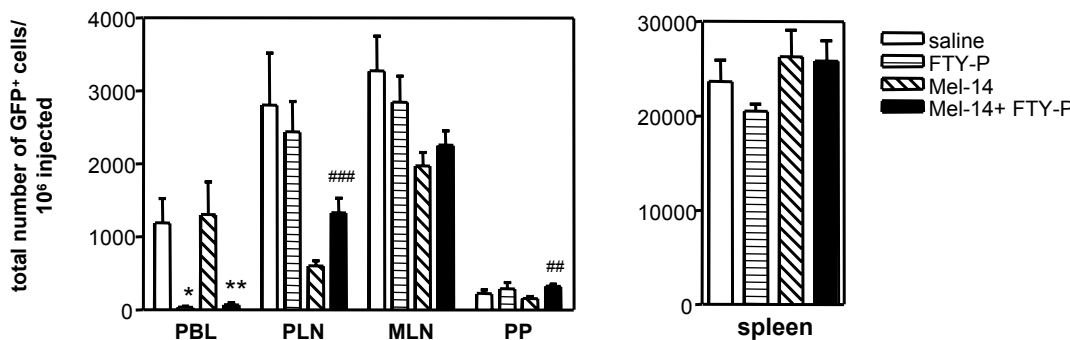

C

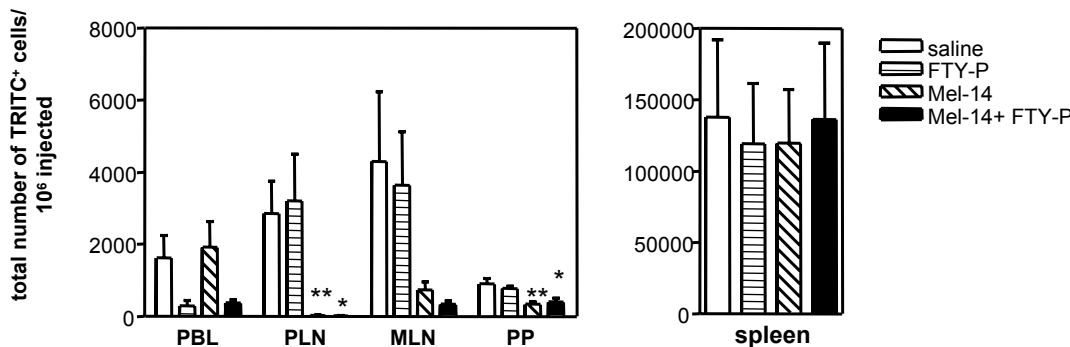

Supplement: blood_2004-09-3687_7.pdf [file blood_2004-09-3687_7.pdf]
